# Supplementary material for: Preschool Children’s Behavioral Tendency toward Social Indirect Reciprocity
Source: PubMed Central journal article supplement (PMC3737253; doi:10.1371/journal.pone.0070915), 2013-08-07
Supplement: pone.0070915.s002.pdf [file pone.0070915.s002.pdf]

**Table S2:** Influence of independent factors on the number of affiliative behavior from bystanders in Analysis 2, Model 2

| Independent term                                                       |       | Coef   | SE (coef) | <i>t</i> | <i>P</i> (>  <i>t</i>  ) |
|------------------------------------------------------------------------|-------|--------|-----------|----------|--------------------------|
| Factors                                                                | Level |        |           |          |                          |
| Intercept                                                              |       | - 0.19 | 0.36      | - 0.53   | 0.60                     |
| Context                                                                | PP    | 0.62   | 0.13      | 4.65     | < 0.001                  |
| Familiarity between focal children and bystanders                      |       | 1.78   | 0.81      | 2.21     | 0.03                     |
| The focal children's usual frequency of receiving affiliative behavior |       | 0.02   | 0.01      | 4.26     | < 0.001                  |

We analyzed the data in 168 sessions (84 PP-MC pairs, focal child = 12, bystander = 30, focal-bystander dyad = 60) in Analysis 2, Model 2. In the factor "context", the parameters were shown in the same way as Table 2.
