# Supplementary material for: Preschool Children’s Behavioral Tendency toward Social Indirect Reciprocity
Source: PubMed Central journal article supplement (PMC3737253; doi:10.1371/journal.pone.0070915), 2013-08-07
Supplement: pone.0070915.s004.pdf [file pone.0070915.s004.pdf]

**Table S4:** Influence of independent factors on the number of affiliative behavior from bystanders in Analysis 3 (recalculation of Analysis 1, Model 2)

| Independent term                                                       |       | Coef | SE (coef) | <i>t</i> | <i>P</i> (>  <i>t</i>  ) |
|------------------------------------------------------------------------|-------|------|-----------|----------|--------------------------|
| Factors                                                                | Level |      |           |          |                          |
| Intercept                                                              |       | 0.15 | 0.48      | 0.32     | 0.75                     |
| Context                                                                | PP    | 0.45 | 0.09      | 5.22     | < 0.001                  |
| Familiarity between focal children and bystanders                      |       | 2.34 | 0.61      | 3.83     | < 0.001                  |
| The focal children's usual frequency of receiving affiliative behavior |       | 0.01 | 0.01      | 2.17     | 0.03                     |

We analyzed the data in 382 sessions (191 PP-MC pairs, focal child = 12, bystander = 44, focal-bystander dyad = 94) in Analysis 3 (recalculation of Analysis 1, Model 2). In the factor "context", the parameters were shown in the same way as Table 2.
