# Supplementary material for: Preschool Children’s Behavioral Tendency toward Social Indirect Reciprocity
Source: PubMed Central journal article supplement (PMC3737253; doi:10.1371/journal.pone.0070915), 2013-08-07
Supplement: pone.0070915.s005.pdf [file pone.0070915.s005.pdf]

**Table S5:** Influence of independent factors on the number of prosocial behavior from bystanders in Analysis 3 (recalculation of Analysis 2, Model 1)

| Independent term                                                     |       | Coef   | SE (coef) | <i>t</i> | <i>P</i> (>  <i>t</i>  ) |
|----------------------------------------------------------------------|-------|--------|-----------|----------|--------------------------|
| Factors                                                              | Level |        |           |          |                          |
| Intercept                                                            |       | - 0.11 | 0.67      | - 0.17   | 0.87                     |
| Context                                                              | PP    | 2.27   | 0.38      | 5.98     | < 0.001                  |
| Familiarity between focal children and bystanders                    |       | 4.45   | 1.79      | 2.49     | 0.01                     |
| The focal children's usual frequency of receiving prosocial behavior |       | 0.11   | 0.09      | - 1.20   | 0.23                     |

We analyzed the data in 138 sessions (69 PP-MC pairs, focal child = 12, bystander = 26, focal-bystander dyad = 51) in Analysis 3 (recalculation of Analysis 2, Model 1). In the factor “context”, the parameters were shown in the same way as Table 2.
